# Supplementary material
Source: PubMed Central journal article supplement (PMC4815518)

**Clade 1 (18 specimens)  
haplotype 9**

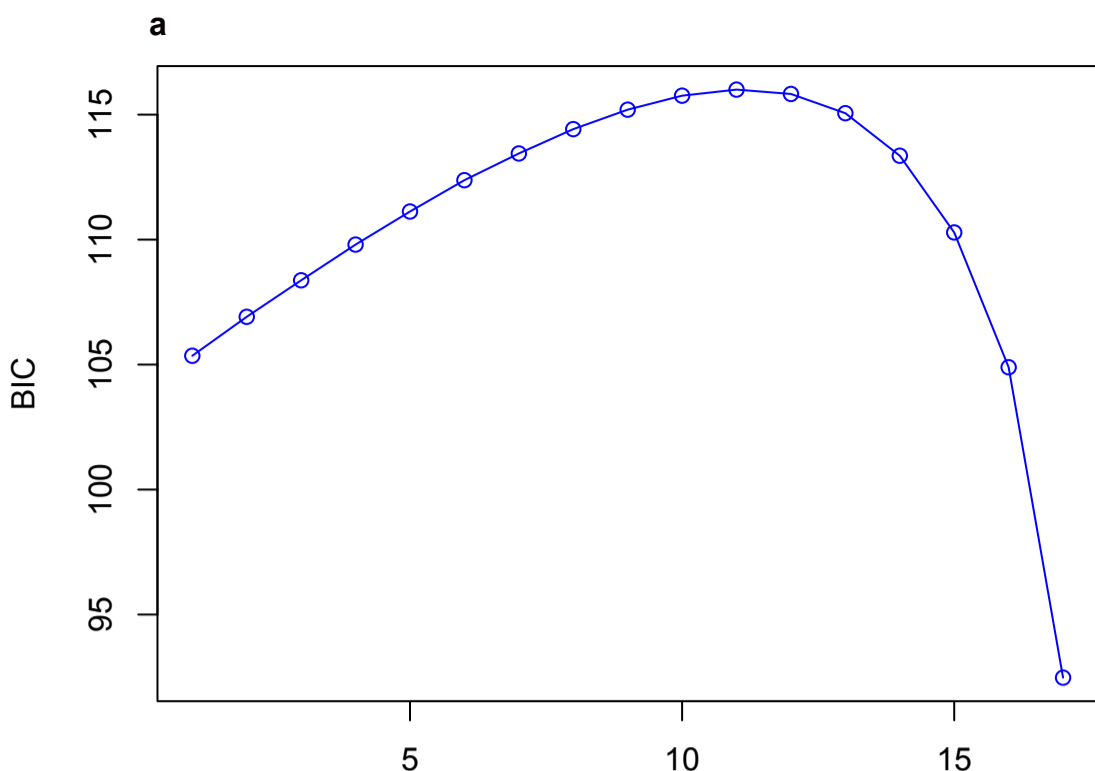

**Clade 2 (20 specimens)  
haplotype 4**

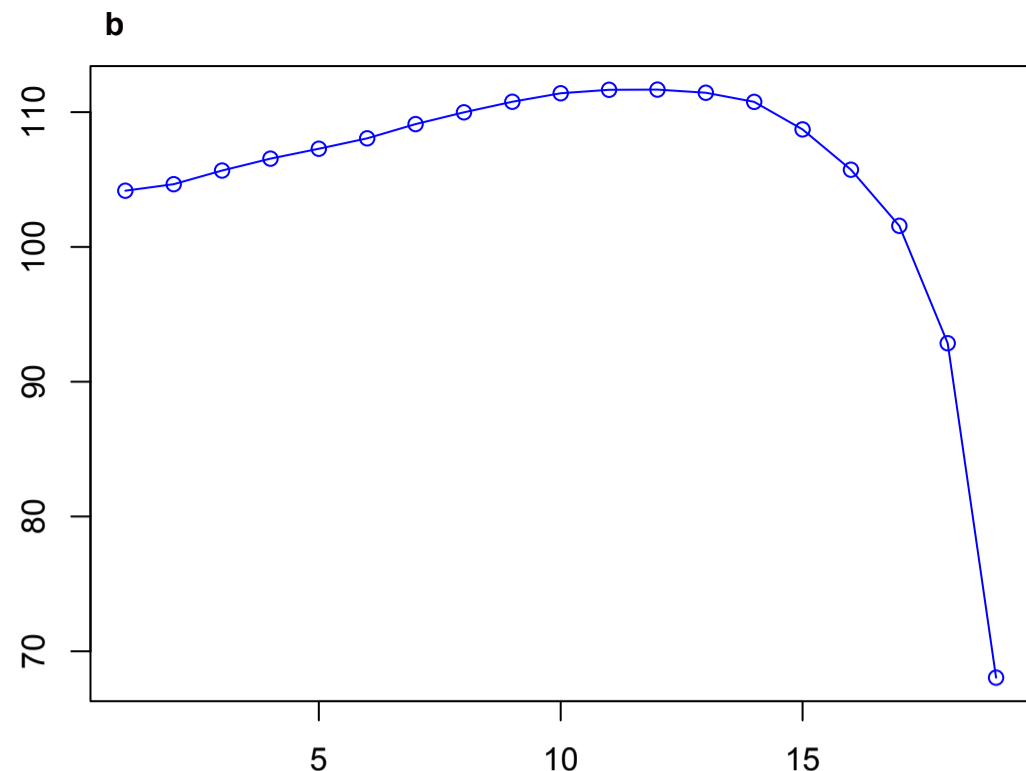

**Clade 3 (31 specimens)  
haplotypes 2, 8, 13**

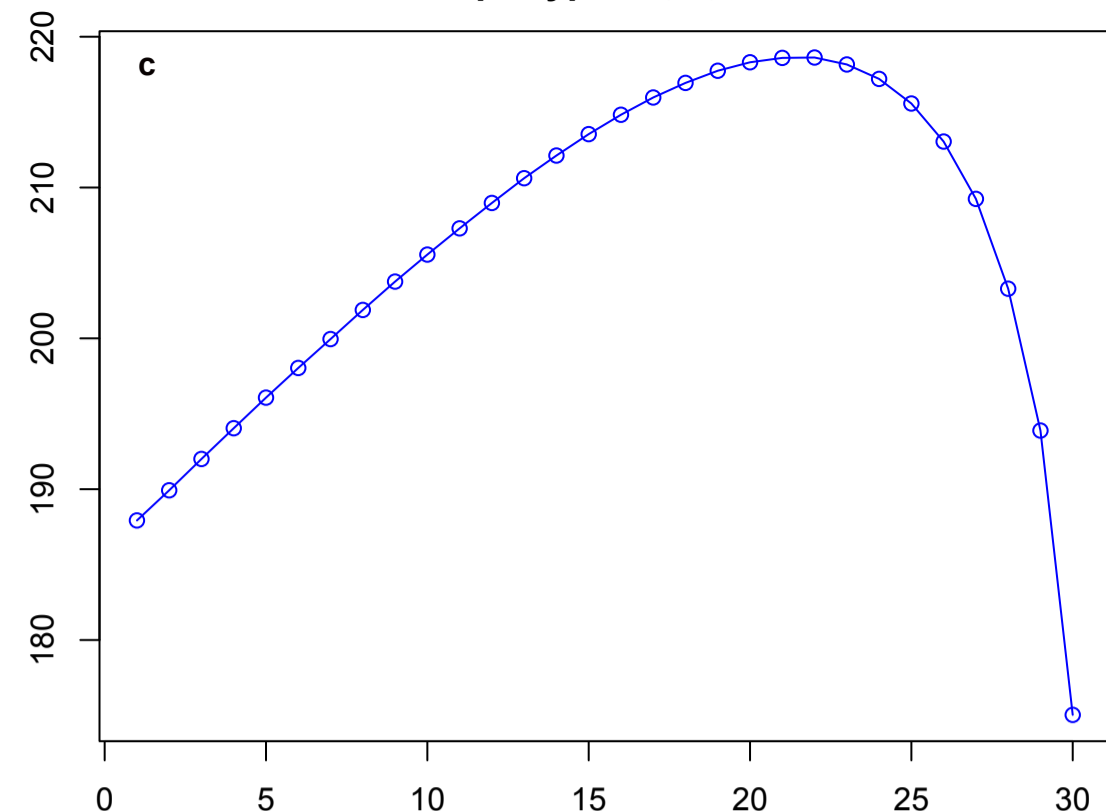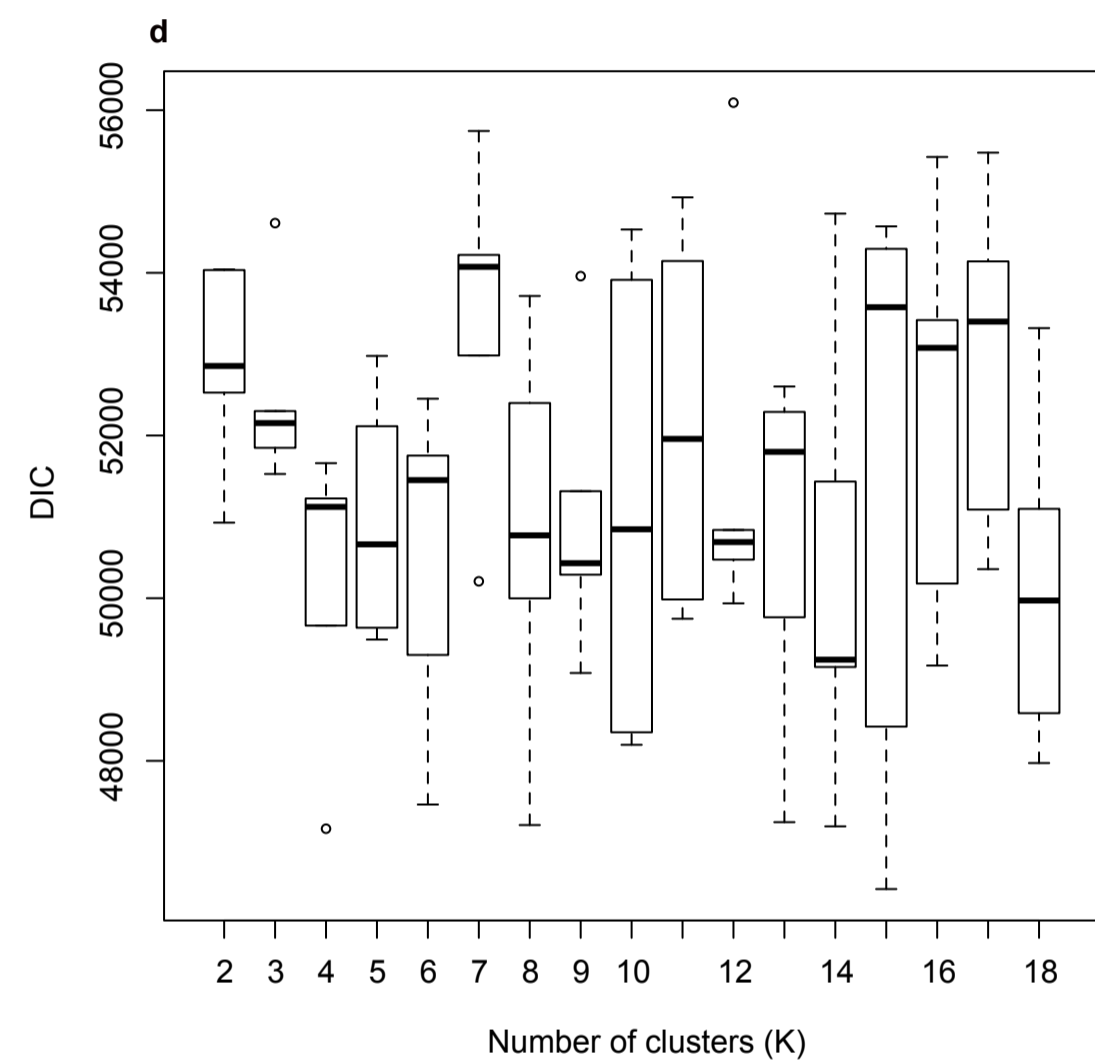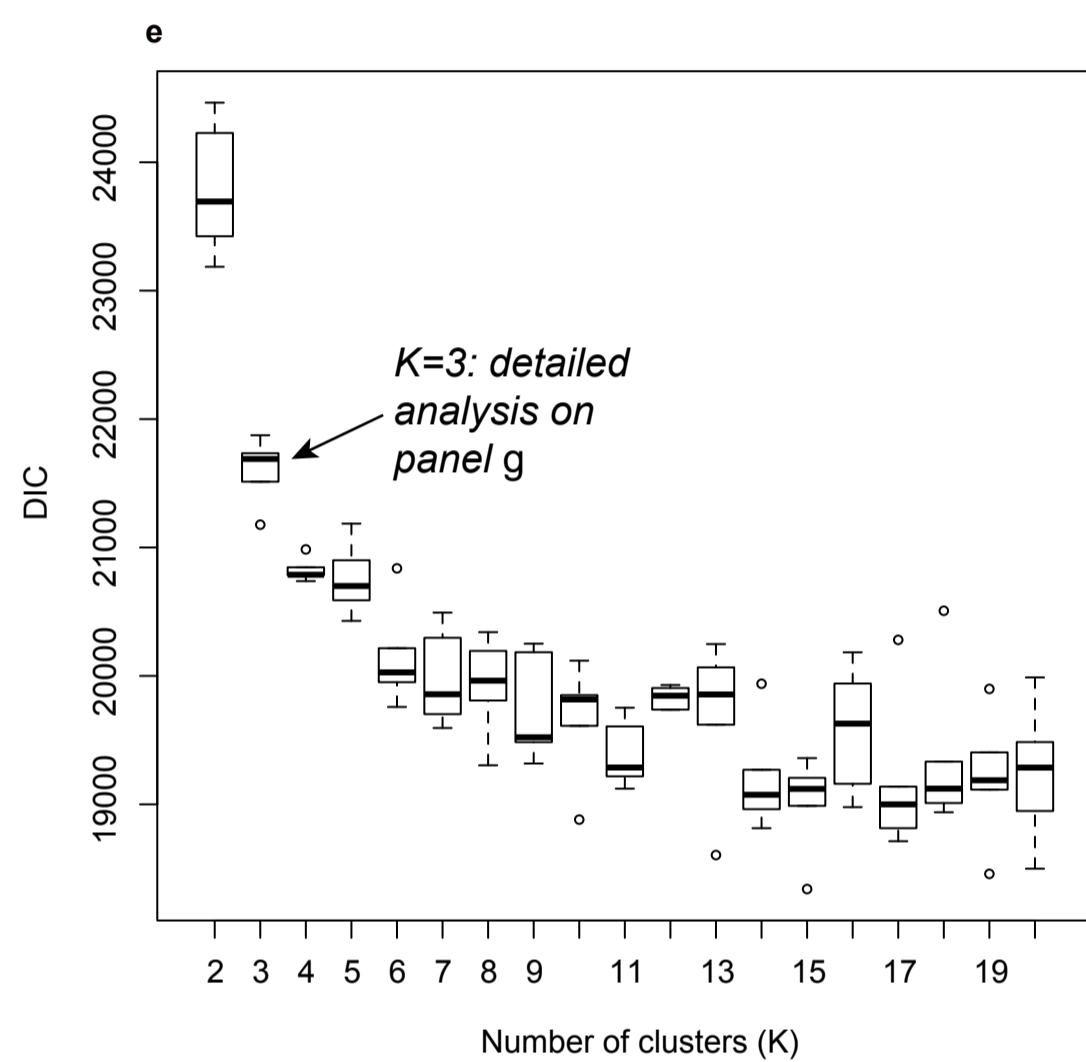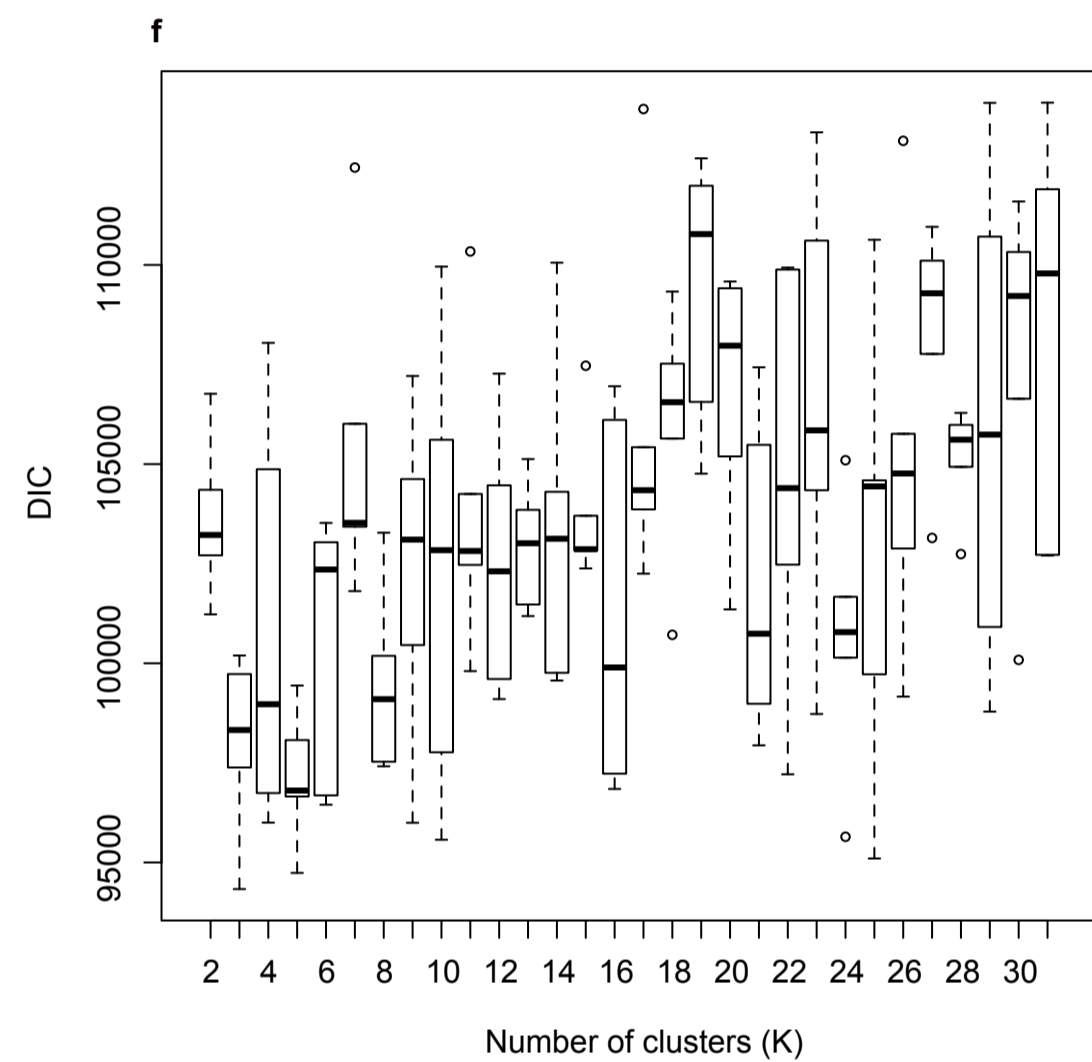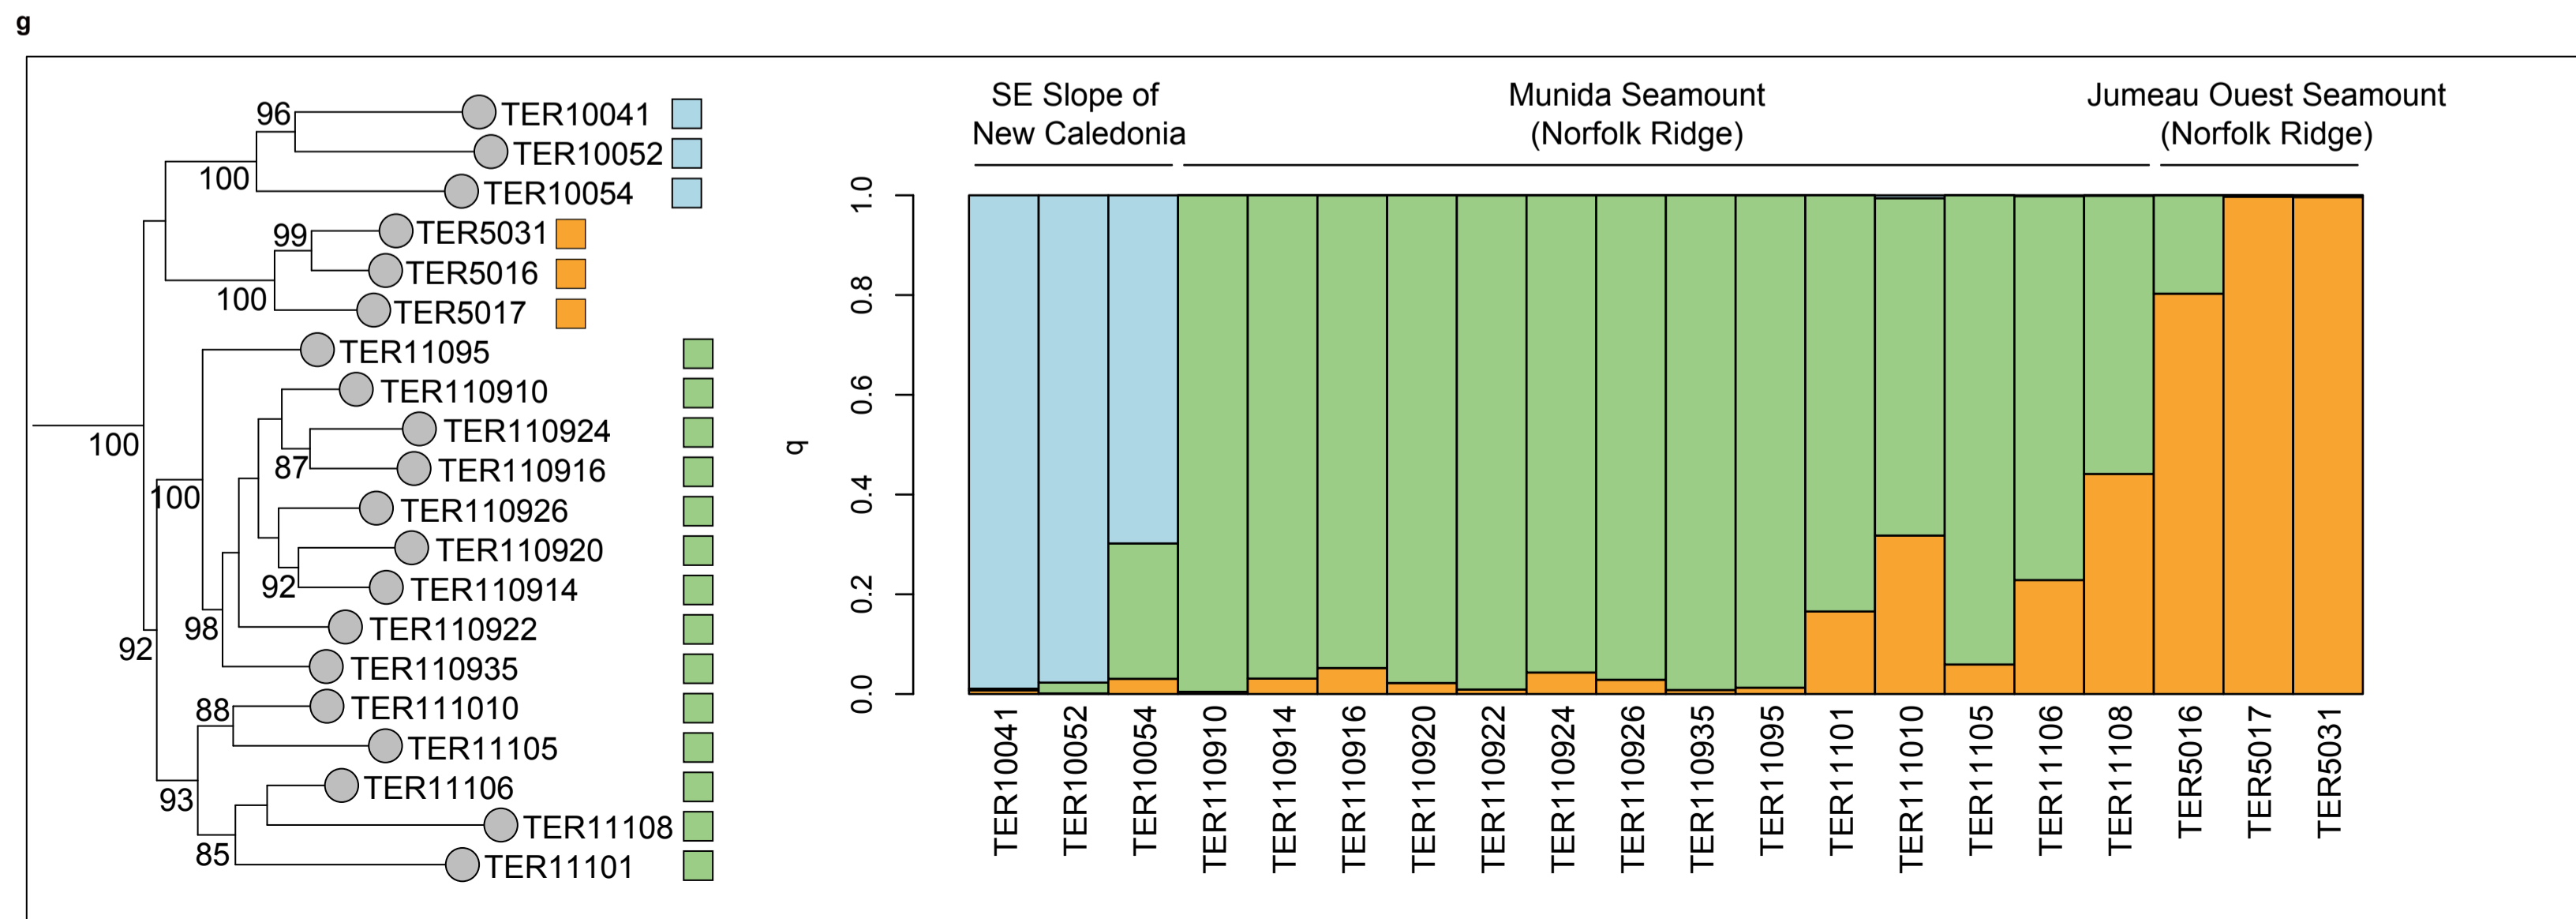

Supplement: hdy2014105x1.pdf [file hdy2014105x1.pdf]
